# Supplementary material for: Synthesis and characterization of donor–acceptor semiconducting polymers containing 4-(4-((2-ethylhexyl)oxy)phenyl)-4H-dithieno[3,2-b:2′,3′-d]pyrrole for organic solar cells
Source: Royal Society of Chemistry journal article supplement (doi:10.1039/d0nj02616f), 2020-01-01
Supplement: d0nj02616f1.pdf [file d0nj02616f1.pdf]

## Electronic Supplementary Information

### Synthesis and Characterization of Donor-Acceptor Semiconducting Polymers Containing 4-(4-((2-ethylhexyl)oxy)phenyl)-4H-dithieno[3,2- b:2',3'-d]pyrrole for Organic Solar Cells

*Huyen Le Thi Mai<sup>1</sup>, Nhung Thanh Thi Truong<sup>1</sup>, Thiet Quoc Nguyen<sup>4</sup>, Bao Kim Doan<sup>1</sup>, Dat Hung Tran<sup>1</sup>,  
Le-Thu T.Nguyen<sup>2</sup>, Lee Woosung<sup>3</sup>, Jae Woong Jung<sup>5</sup>, Mai Ha Hoang<sup>6</sup>, Ha Phuong Ky Huynh<sup>1</sup>, Chau Duc  
Tran<sup>\*2</sup>, Ha Tran Nguyen<sup>\*1,2</sup>*

<sup>1</sup>National Key Laboratory of Polymer and Composite Materials, Ho Chi Minh City University of Technology, Vietnam National University–Ho Chi Minh City (VNU–HCM), 268 Ly Thuong Kiet, District 10, Ho Chi Minh City, Vietnam.

<sup>2</sup>Ho Chi Minh City University of Technology, Vietnam National University, 268 Ly Thuong Kiet, District 10, Ho Chi Minh City, Vietnam.

<sup>3</sup>Smart textile R&D group, Korea Institute of Industrial Technology, Ansan, (KITECH)

<sup>4</sup> Institute of Applied Materials Science, Vietnam Academy of Science and Technology, 01 TL29, District 12, Ho Chi Minh City, Vietnam

<sup>5</sup> Department of Advanced Materials Engineering for Information & Electronics, Kyung Hee University, 1732 Deogyong-daero, Giheung-gu, Yongin-si, Gyeonggi-do 446-701, Republic of Korea

<sup>6</sup> Institute of Chemistry, Vietnam Academy of Science and Technology, Hanoi, Vietnam

\* Corresponding author: [nguyentranha@hcmut.edu.vn](mailto:nguyentranha@hcmut.edu.vn)

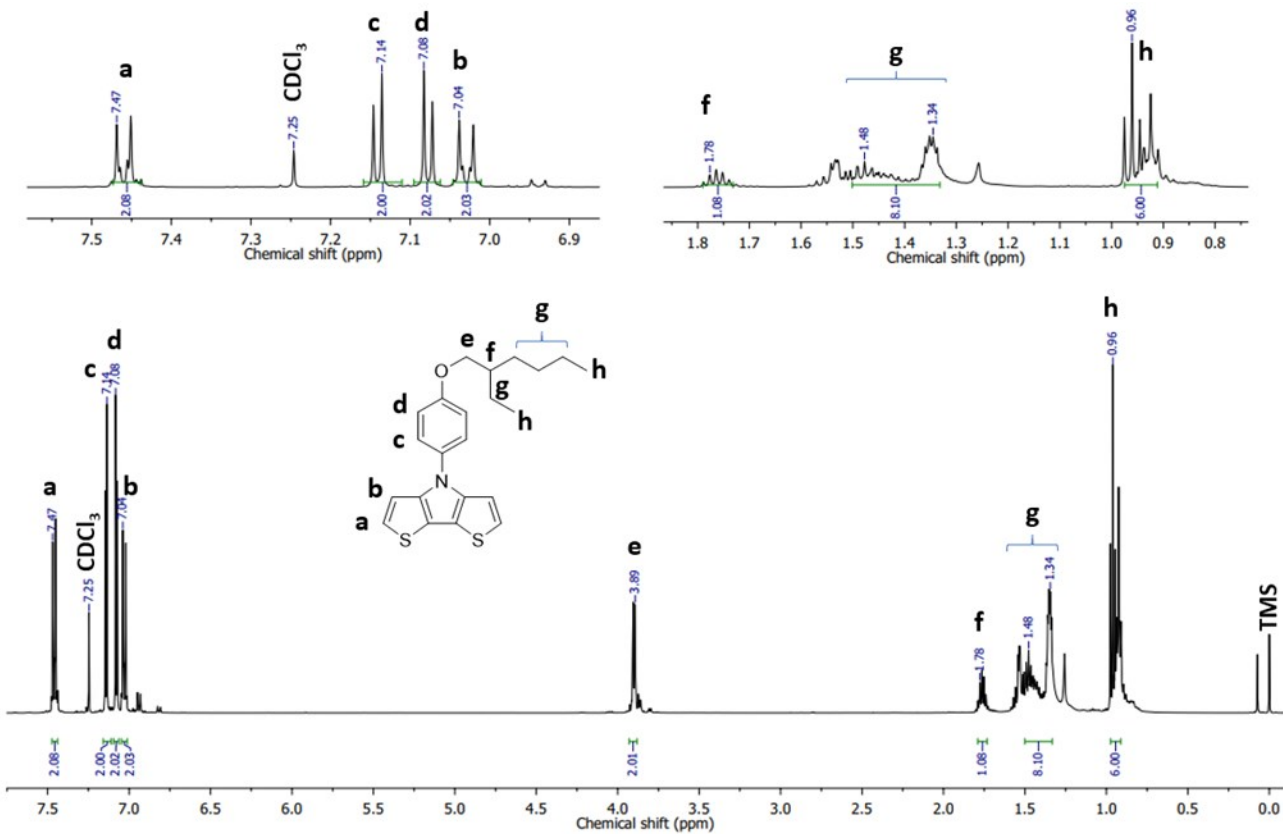

Figure S1. <sup>1</sup>H NMR spectrum of 4-(4-((2-ethylhexyl)oxy)phenyl)-4H-dithieno[3,2-b:2',3'-d]pyrrole (EHOPDTP, M3).

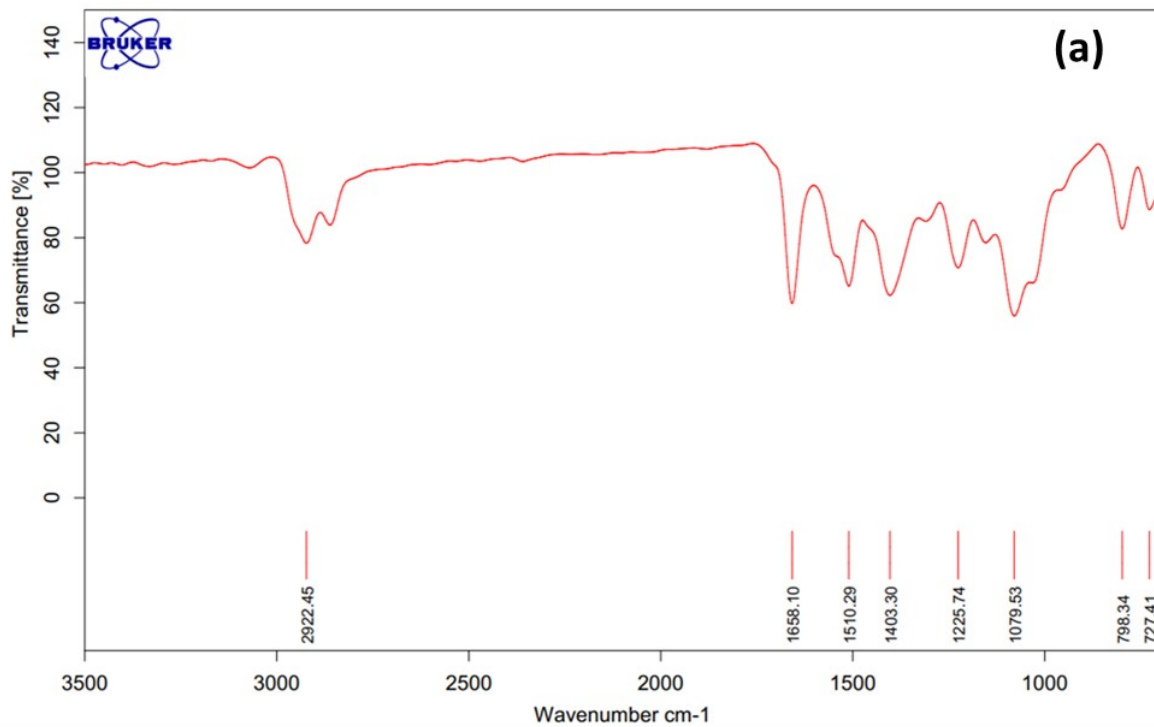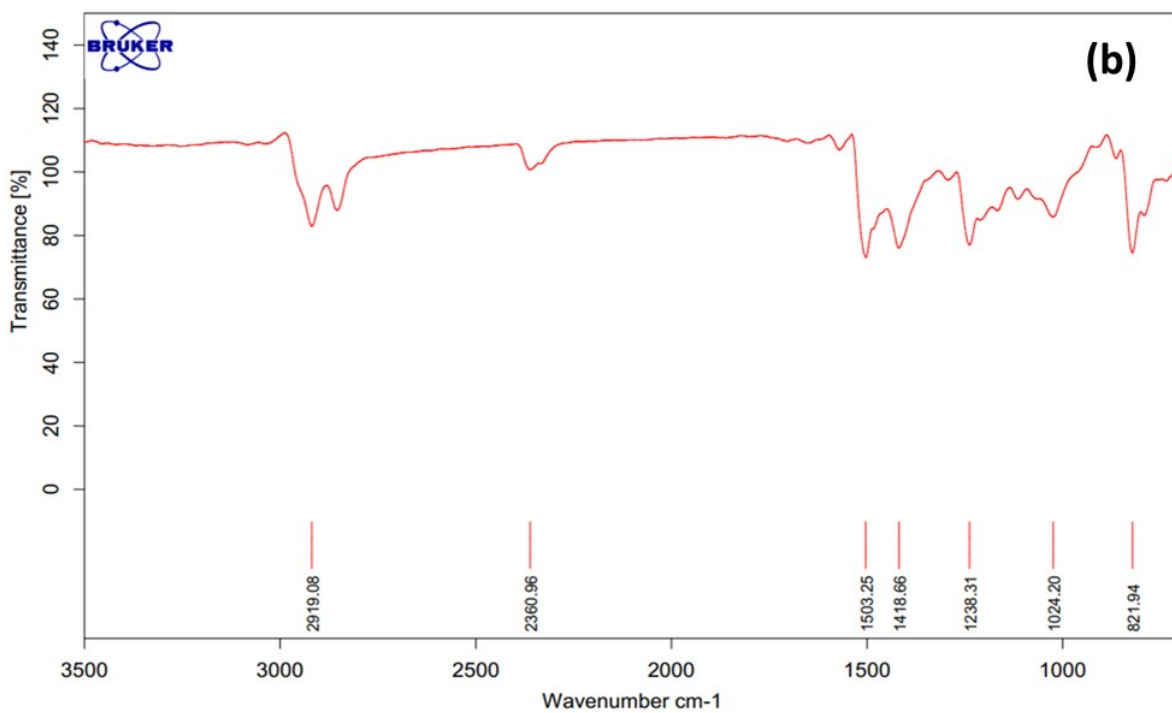

Figure S2. FTIR spectrum of D-A conjugated polymers P1 (a) and P2 (b)
